# Supplementary material for: A novel, label-free fluorescence detection method for the formation of G-quadruplex DNA based on DNA-templated silver nanoclusters
Source: Royal Society of Chemistry journal article supplement (doi:10.1039/c7ra02984e), 2017-01-01
Supplement: c7ra02984e1.pdf [file c7ra02984e1.pdf]

## Supporting Information

### **A novel, label-free fluorescence detection method for the formation of the G-quadruplex DNAs based on the DNA-templated silver nanoclusters**

Jiaona Xu, Chunying Wei\*

Key Laboratory of Chemical Biology and Molecular Engineering of Ministry of Education, Institute of Molecular Science, Shanxi University, Taiyuan 030006, P. R. China

\*Corresponding author: Chunying Wei; E-mail address: weichuny@sxu.edu.cn..

Phone: (86) 351-7010699; Fax: (86) 351-7018429

**Table S1.** Names and sequences of the oligonucleotides.

| Oligonucleotides | Sequences (5' - 3')                                       |
|------------------|-----------------------------------------------------------|
| TBA1             | CCCTTAATCCCCTTTGGTTGGTGTGGTTGGAAACCCTAACTCCCC             |
| TBA2             | CCCTTAATCCCCTTTGGTTGGTGTGGTTGGAAACCCTTAATCCCC             |
| TBA3             | CCCTTAATCCCCTTTGGTTGGTGTGGTTGGAAAGGGTGGGGTGGGG<br>TGGGG   |
| C-TBA2           | TTTCCAACCACACCAACCAAA                                     |
| TBA              | GGTTGGTGTGGTTGG                                           |
| M-TBA2           | CCCTTAATCCCCTTTGGTTGATGTGATTGGAAACCCTTAATCCCC             |
| AGRO100          | CCCTTAATCCCCGGTGGTGGTGGTTGTGGTGGTGGTGGCCCTTAAT<br>CCCC    |
| C-AGTO100        | CCACCACCACCACAACCACCACCACC                                |
| O-AGRO100        | GGTGGTGGTGGTTGTGGTGGTGGTGG                                |
| T30695           | CCCTTAATCCCCTTTGGGTGGGTGGGTGGGTAAACCCTTAATCCCC            |
| C-T30695         | TTT ACCCACCACCCACCC AAA                                   |
| O-T30695         | GGGTGGGTGGGTGGGT                                          |
| kit              | CCCTTAATCCCCTTTTCGGGCGGGCGCGAGGGAGGGGAAACCCTTA<br>ATCCCC  |
| C-kit            | TTT CCCCTCCCTCGCGCCCGCCCG AAA                             |
| O-kit            | CGGGCGGGCGCGAGGGAGGGG                                     |
| bcl-2            | CCCTTAATCCCCTTTGGGCGCGGGAGGAAGGGGGCGGGAAACCCT<br>TAATCCCC |
| C-bcl-2          | TTT CCCGCCCCCTTCCTCCCGCGCCC AAA                           |
| O-bcl-2          | GGGCGCGGGAGGAAGGGGGCGGG                                   |
| HTG              | CCCTTAATCCCCTTTGGGTAGGGTTAGGGTTAGGGAAACCCTTAA<br>TCCCC    |
| C-HTG            | TTT CCCTAACCTAACCTAACCC AAA                               |
| O-HTG            | GGGTAGGGTTAGGGTTAGGG                                      |

**Table S2** The lifetimes of different DNA-Ag NCs

| Samples     | $\tau_1$ (ns) | $\alpha_1$ (%) | $\tau_2$ (ns) | $\alpha_2$ (%) | $\tau_3$ (ns) | $\alpha_3$ (%) | $\langle \tau_a \rangle$ | $\chi^2$ |
|-------------|---------------|----------------|---------------|----------------|---------------|----------------|--------------------------|----------|
| TBA2        | 0.84          | 26.99          | 2.53          | 67.72          | 6.42          | 5.29           | 2.28                     | 1.000    |
| TBA2/C-TBA2 | 0.73          | 26.93          | 2.47          | 67.87          | 6.63          | 5.19           | 2.22                     | 1.000    |
| M-TBA2      | 0.82          | 28.84          | 2.44          | 64.24          | 5.40          | 6.91           | 2.18                     | 1.000    |

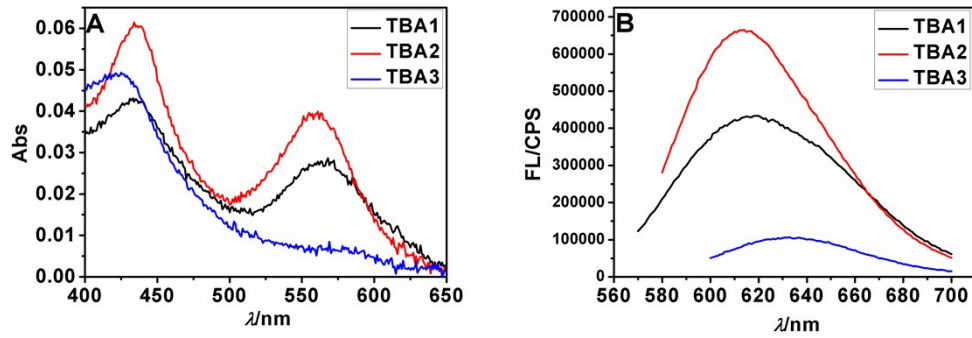

**Fig.S1** The Ag NCs synthesized with the sequences of TBA1, TBA2, and TBA3 as the templates in 20 mM PBS-K buffer. (A) UV-vis absorption spectra and (B) Fluorescence emission spectra of DNA-Ag NCs.

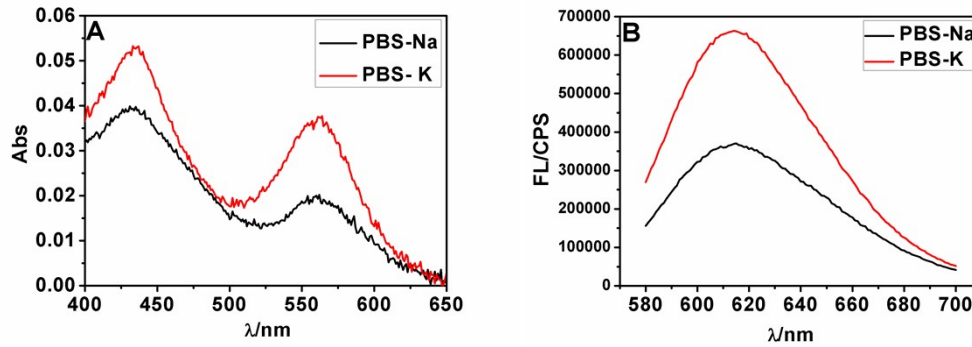

**Fig.S2** The TBA2-Ag NCs synthesized in 20 mM PBS-Na or PBS-K buffer. (A) UV-vis absorption spectra and (B) Fluorescence emission spectra of DNA-Ag NCs.

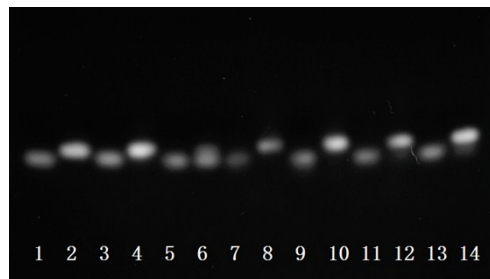

**Fig.S3** Agarose gel electrophoresis (AGE) analysis. Different DNAs were added into lanes 1-14. Lane 1: TBA2; lane 2: TBA2/C-TBA2; lane 3: AGRO100; lane 4: AGRO100/C-AGRO100; lane 5: T30695; lane 6: T30695/C-T30695; lane 7: kit; lane 8: kit/C-kit; lane 9: bcl-2; lane 10: bal-2/C-bcl-2; lanes 11 and 13: HTG; lanes 12 and 14: HTG/C-HTG. They were in PBS buffer contains 40 mM K<sup>+</sup> (lanes 1-12) or Na<sup>+</sup> (only for lanes 13 and 14). Concentrations for each DNA in AGE are all 3.0 μM.

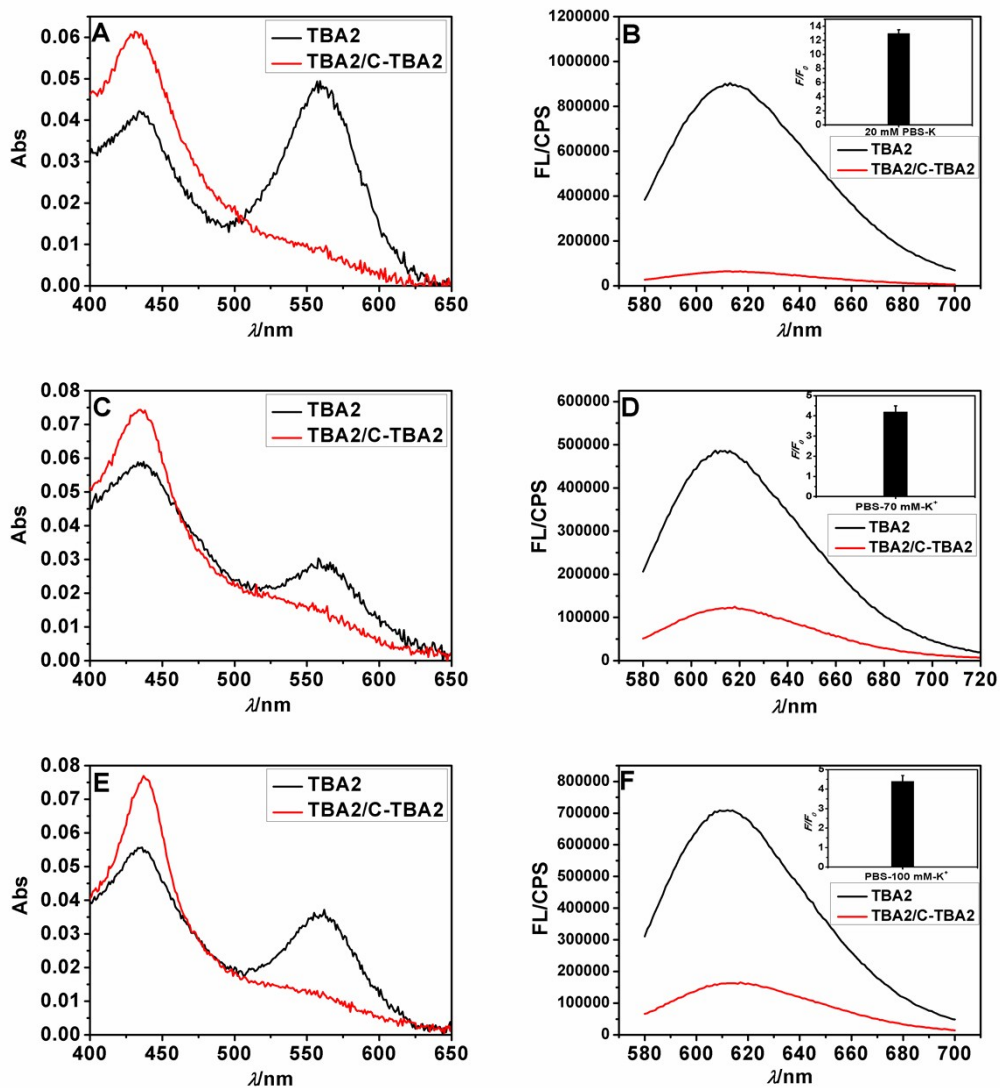

**Fig.S4** The Ag NCs synthesized with the sequences TBA2 and TBA2/C-TBA2 in Table S1 as the templates. The UV-vis absorption spectra (A, C and E) and the fluorescence emission spectra (B, D and F) of Ag NCs in the presence of different concentrations of  $K^+$ . The inset showed the  $F/F_0$ . A and B: 20 mM PBS-K buffer; C and D: PBS buffer containing 70 mM  $K^+$ ; E and F: PBS buffer containing 100 mM  $K^+$ .

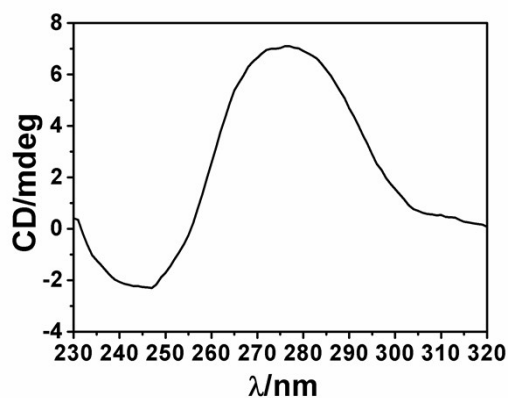

**Fig.S5** CD spectra of TBA2-Ag NCs obtained with 5  $\mu$ M DNA in PBS buffer containing 40 mM  $K^+$ .

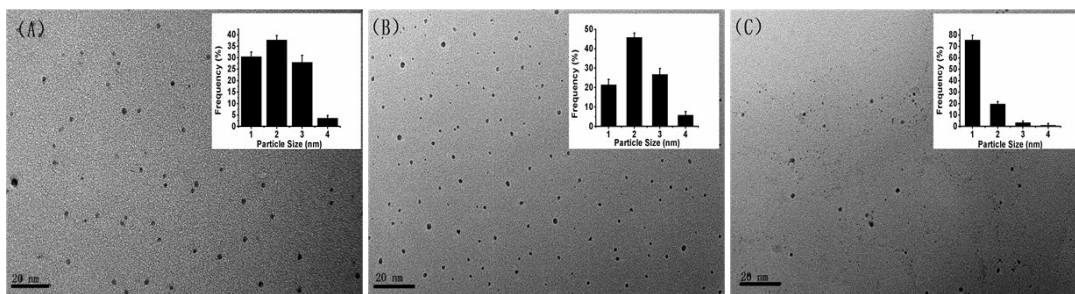

**Fig.S6** TEM images of TBA2-Ag NCs (A), TBA2/C-TBA2-Ag NCs (B) and M-TBA2-Ag NCs (C). The inset showed the size distribution histogram.

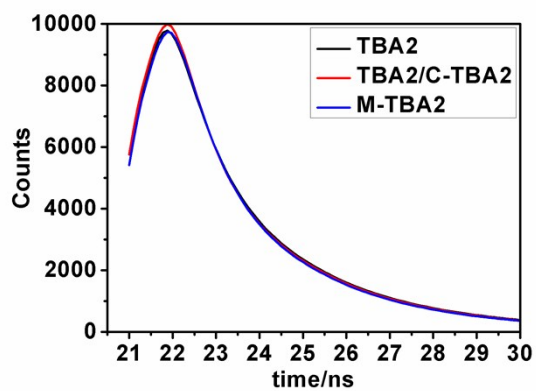

**Fig.S7** The TCSPC data for TBA2-Ag NCs, TBA2/C-TBA2-Ag NCs and M-TBA2 Ag NCs (excitation at 405 nm and emission at 620 nm).

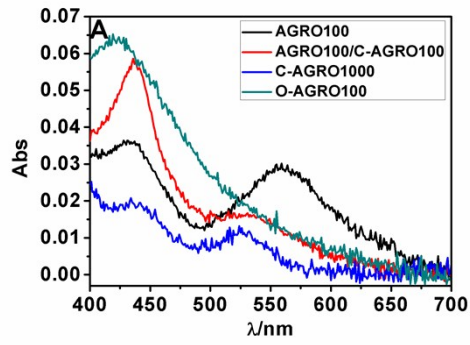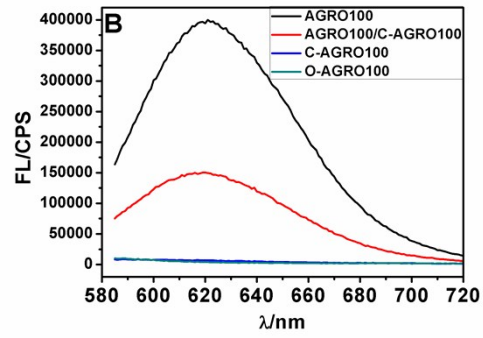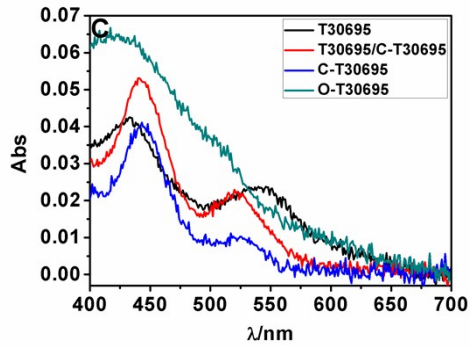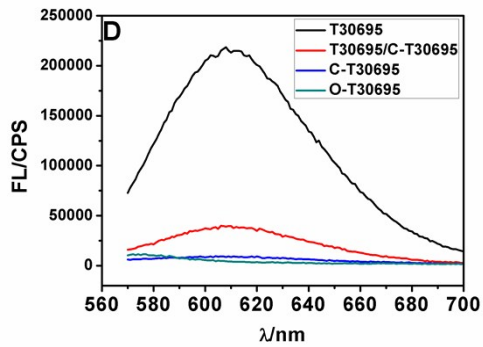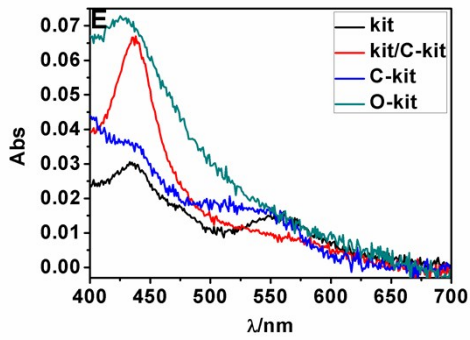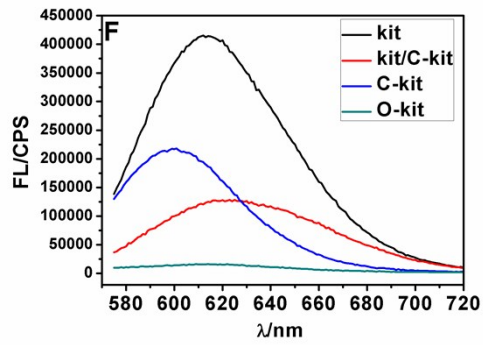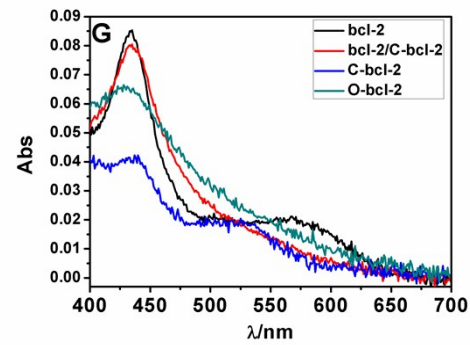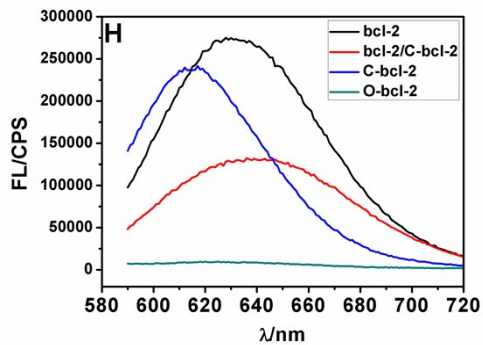

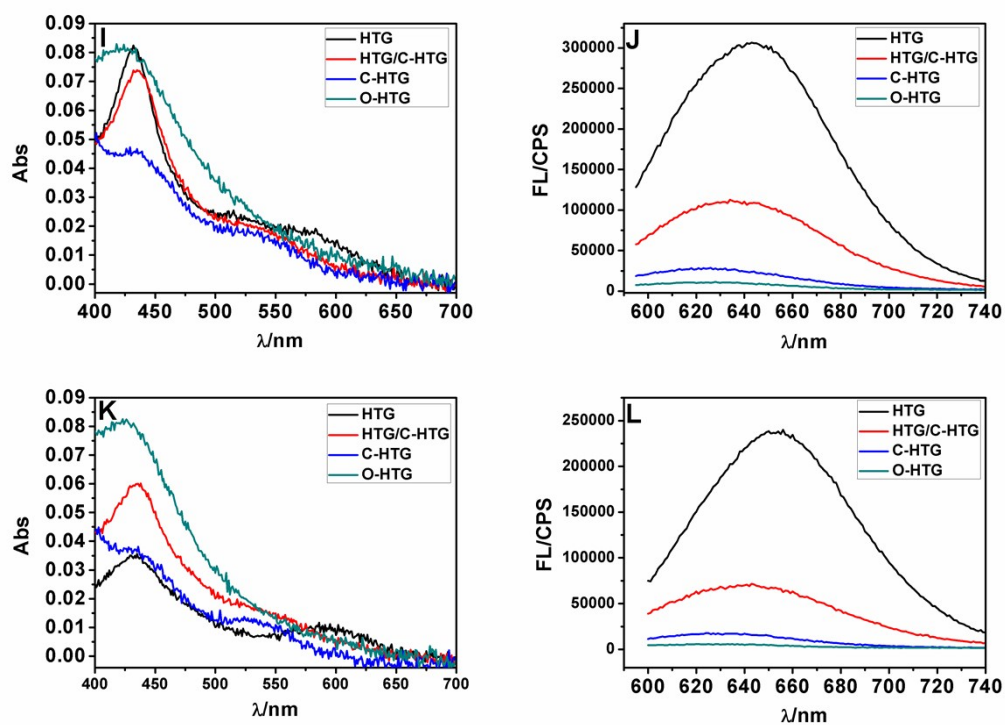

**Fig.S8** The UV-vis absorption spectra (A, C, E, G, I and K) and fluorescence emission spectra (B, D, F, H, J and L) of different G-rich DNA sequences templated Ag NCs. A and B: AGRO100-, C-AGRO100-, O-AGRO100 and AGRO100/C-AGRO100-templated Ag NCs; C and D: T30695-, C-T30695-, O-T30695- and T30695/C-T30695-templated Ag NCs; E and F: kit-, C-kit-, O-kit- and kit/C-kit-templated Ag NCs; G and H: bcl-2-, C-bal-2-, O-bcl-2- and bcl-2/C-bcl-2-templated Ag NCs; I, J, K and L: HTG-, C-HTG-, O-HTG- and HTG/C-HTG-templated Ag NCs. They were synthesized in PBS buffer contains 40 mM K<sup>+</sup> (A~J) or Na<sup>+</sup> (only for K and L).
